# Supplementary material
Source: publisher figshare collection journal article supplement (https://gsajournals.figshare.com/ndownloader/files/22441139)
Supplement: Supplementary file 1 [file 22441139]

## Sheet: Hyphae
PFAM EXCLUSIVELY IN HYPHAE (log2FC < -4 , FDR-pvalue < 0.001)			KEGG pathway EXCLUSIVELY IN HYPHAE (log2FC < -4 , FDR-pvalue < 0.001)
PFAM	Protein name			ko Pathway	Name
PF00089	Trypsin			ko00513	Various types of Nglycan biosynthesis
PF00135	Carboxylesterase family
PF01048	Phosphorylase superfamily
PF13520	Amino acid permease
PF00026	Eukaryotic aspartyl protease
PF01636	Phosphotransferase enzyme family
PF02668	Taurine catabolism dioxygenase TauD, TfdA family
PF03171	2OG-Fe(II) oxygenase superfamily
PF11807	Domain of unknown function (DUF3328)
PF00006	ATP synthase alpha/beta family, nucleotide-binding domain
PF00083	Sugar (and other) transporter
PF00155	Aminotransferase class I and II
PF00188	Cysteine-rich secretory protein family
PF00271	Helicase conserved C-terminal domain
PF00350	Dynamin family
PF00400	WD domain, G-beta repeat
PF00931	NB-ARC domain
PF01031	Dynamin central region
PF02353	Mycolic acid cyclopropane synthetase
PF02666	Phosphatidylserine decarboxylase
PF03098	Animal haem peroxidase
PF03328	HpcH/HpaI aldolase/citrate lyase family
PF04488	Glycosyltransferase sugar-binding region containing DXD motif
PF05577	Serine carboxypeptidase S28
PF05699	hAT family C-terminal dimerisation region
PF06101	Plant protein of unknown function (DUF946)
PF10528	GLEYA domain
PF13417	Glutathione S-transferase, N-terminal domain
PF00061	Lipocalin / cytosolic fatty-acid binding protein family
PF00069	Protein kinase domain
PF00072	Response regulator receiver domain
PF00076	RNA recognition motif. (a.k.a. RRM, RBD, or RNP domain)
PF00152	tRNA synthetases class II (D, K and N)
PF00164	Ribosomal protein S12/S23
PF00168	C2 domain
PF00176	SNF2 family N-terminal domain
PF00186	Dihydrofolate reductase
PF00202	Aminotransferase class-III
PF00225	Kinesin motor domain
PF00226	DnaJ domain
PF00232	Glycosyl hydrolase family 1
PF00270	DEAD/DEAH box helicase
PF00282	Pyridoxal-dependent decarboxylase conserved domain
PF00314	Thaumatin family
PF00413	Matrixin
PF00459	Inositol monophosphatase family
PF00487	Fatty acid desaturase
PF00621	RhoGEF domain
PF00650	CRAL/TRIO domain
PF00750	tRNA synthetases class I (R)
PF00775	Dioxygenase
PF00881	Nitroreductase family
PF01063	Aminotransferase class IV
PF01184	GPR1/FUN34/yaaH family
PF01222	Ergosterol biosynthesis ERG4/ERG24 family
PF01244	Membrane dipeptidase (Peptidase family M19)
PF01263	Aldose 1-epimerase
PF01301	Glycosyl hydrolases family 35
PF01328	Peroxidase, family 2
PF01471	Putative peptidoglycan binding domain
PF01532	Glycosyl hydrolase family 47
PF01554	MatE
PF01575	MaoC like domain
PF01663	Type I phosphodiesterase / nucleotide pyrophosphatase
PF01738	Dienelactone hydrolase family
PF01755	Glycosyltransferase family 25 (LPS biosynthesis protein)
PF01764	Lipase (class 3)
PF01814	Hemerythrin HHE cation binding domain
PF01823	MAC/Perforin domain
PF01828	Peptidase A4 family
PF01979	Amidohydrolase family
PF02133	Permease for cytosine/purines, uracil, thiamine, allantoin
PF02221	ML domain
PF02225	PA domain
PF02458	Transferase family
PF02492	CobW/HypB/UreG, nucleotide-binding domain
PF02515	CoA-transferase family III
PF02547	Queuosine biosynthesis protein
PF02679	(2R)-phospho-3-sulfolactate synthase (ComA)
PF02826	D-isomer specific 2-hydroxyacid dehydrogenase, NAD binding domain
PF02874	ATP synthase alpha/beta family, beta-barrel domain
PF03060	Nitronate monooxygenase
PF03061	Thioesterase superfamily
PF03068	Protein-arginine deiminase (PAD)
PF03101	FAR1 DNA-binding domain
PF03702	Uncharacterised protein family (UPF0075)
PF03765	CRAL/TRIO, N-terminal domain
PF03856	Beta-glucosidase (SUN family)
PF04116	Fatty acid hydroxylase superfamily
PF04646	Protein of unknown function, DUF604
PF04681	Blastomyces yeast-phase-specific protein
PF04734	Neutral/alkaline non-lysosomal ceramidase
PF04749	PLAC8 family
PF04820	Tryptophan halogenase
PF05257	CHAP domain
PF05686	Glycosyl transferase family 90
PF05746	DALR anticodon binding domain
PF06293	Lipopolysaccharide kinase (Kdo/WaaP) family
PF07103	Protein of unknown function (DUF1365)
PF07472	Fucose-binding lectin II (PA-IIL)
PF07478	D-ala D-ala ligase C-terminus
PF07683	Cobalamin synthesis protein cobW C-terminal domain
PF07938	Fungal fucose-specific lectin
PF07944	Putative glycosyl hydrolase of unknown function (DUF1680)
PF08354	Domain of unknown function (DUF1729)
PF09044	Kp4
PF09056	Prokaryotic phospholipase A2
PF09286	Pro-kumamolisin, activation domain
PF10435	Beta-galactosidase, domain 2
PF10551	MULE transposase domain
PF10685	Stress-induced bacterial acidophilic repeat motif
PF11034	Protein of unknown function (DUF2823)
PF11700	Vacuole effluxer Atg22 like
PF11915	Protein of unknown function (DUF3433)
PF11937	Protein of unknown function (DUF3455)
PF12146	Putative lysophospholipase
PF12588	Phophatidylserine decarboxylase
PF12770	CHAT domain
PF12894	Anaphase-promoting complex subunit 4 WD40 domain
PF13363	Beta-galactosidase, domain 3
PF13364	Beta-galactosidase jelly roll domain
PF13401	AAA domain
PF13598	Domain of unknown function (DUF4139)
PF13600	N-terminal domain of unknown function (DUF4140)
PF13826	Domain of unknown function (DUF4188)
PF14027	Protein of unknown function (DUF4243)
PF14040	Deoxyribonuclease NucA/NucB
PF14200	Ricin-type beta-trefoil lectin domain-like
PF14478	Domain of unknown function (DUF4430)
PF14518	Iron-containing redox enzyme
PF14521	Lysine-specific metallo-endopeptidase
PF15456	Up-regulated During Septation
PF16541	#N/A
PF17048	#N/A
PF17100	#N/A

## Sheet: Blastospores
PFAM EXCLUSIVELY IN BLASTOSPORES (log2FC > 4 , FDR-pvalue < 0.001)			KEGG pathway EXCLUSIVELY IN BLASTOSPORES (log2FC > 4 , FDR-pvalue < 0.001)
PFAM	Protein name			ko Pathway	name
				ko00010	Glycolysis / Gluconeogenesis
PF00175	Oxidoreductase NAD-binding domain			ko00071	Fatty acid degradation
PF01494	FAD binding domain			ko00190	Oxidative phosphorylation
PF08592	Domain of unknown function (DUF1772)			ko00260	Glycine, serine and threonine metabolism
PF00107	Zinc-binding dehydrogenase			ko00310	Lysine degradation
PF00173	Cytochrome b5-like Heme/Steroid binding domain			ko00340	Histidine metabolism
PF00042	Globin			ko00350	Tyrosine metabolism
PF00348	Polyprenyl synthetase			ko00360	Phenylalanine metabolism
PF00970	Oxidoreductase FAD-binding domain			ko00380	Tryptophan metabolism
PF00975	Thioesterase domain			ko00410	betaAlanine metabolism
PF01040	UbiA prenyltransferase family			ko00620	Pyruvate metabolism
PF01988	VIT family			ko00630	Glyoxylate and dicarboxylate metabolism
PF02798	Glutathione S-transferase, N-terminal domain			ko01100	Metabolic pathways
PF11951	Fungal specific transcription factor domain			ko01110	Biosynthesis of secondary metabolites
PF00010	Helix-loop-helix DNA-binding domain			ko01130	Biosynthesis of antibiotics
PF00121	Triosephosphate isomerase			ko01200	Carbon metabolism
PF00174	Oxidoreductase molybdopterin binding domain
PF00201	UDP-glucoronosyl and UDP-glucosyl transferase
PF00258	Flavodoxin
PF00319	SRF-type transcription factor (DNA-binding and dimerisation domain)
PF00355	Rieske [2Fe-2S] domain
PF00378	Enoyl-CoA hydratase/isomerase family
PF00463	Isocitrate lyase family
PF00491	Arginase family
PF00579	tRNA synthetases class I (W and Y)
PF00622	SPRY domain
PF00636	Ribonuclease III domain
PF00667	FAD binding domain
PF00689	Cation transporting ATPase, C-terminus
PF00690	Cation transporter/ATPase, N-terminus
PF00701	Dihydrodipicolinate synthetase family
PF00755	Choline/Carnitine o-acyltransferase
PF00857	Isochorismatase family
PF00984	UDP-glucose/GDP-mannose dehydrogenase family, central domain
PF01077	Nitrite and sulphite reductase 4Fe-4S domain
PF01124	MAPEG family
PF01144	Coenzyme A transferase
PF01179	Copper amine oxidase, enzyme domain
PF01185	Fungal hydrophobin
PF01231	Indoleamine 2,3-dioxygenase
PF01284	Membrane-associating domain
PF01285	TEA/ATTS domain family
PF01293	Phosphoenolpyruvate carboxykinase
PF01490	Transmembrane amino acid transporter protein
PF01735	Lysophospholipase catalytic domain
PF01786	Alternative oxidase
PF02502	Ribose/Galactose Isomerase
PF02727	Copper amine oxidase, N2 domain
PF02728	Copper amine oxidase, N3 domain
PF02733	Dak1 domain
PF02734	DAK2 domain
PF03198	Glucanosyltransferase
PF03370	Putative phosphatase regulatory subunit
PF03372	Endonuclease/Exonuclease/phosphatase family
PF03404	Mo-co oxidoreductase dimerisation domain
PF03460	Nitrite/Sulfite reductase ferredoxin-like half domain
PF03583	Secretory lipase
PF03721	UDP-glucose/GDP-mannose dehydrogenase family, NAD binding domain
PF03928	Domain of unknown function (DUF336)
PF04185	Phosphoesterase family
PF04209	homogentisate 1,2-dioxygenase
PF04324	BFD-like [2Fe-2S] binding domain
PF05050	Methyltransferase FkbM domain
PF05141	Pyoverdine/dityrosine biosynthesis protein
PF05153	Family of unknown function (DUF706)
PF05724	Thiopurine S-methyltransferase (TPMT)
PF05730	CFEM domain
PF06011	Transient receptor potential (TRP) ion channel
PF06100	Streptococcal 67 kDa myosin-cross-reactive antigen like family
PF06172	Cupin superfamily (DUF985)
PF06500	Alpha/beta hydrolase of unknown function (DUF1100)
PF06628	Catalase-related immune-responsive
PF07859	alpha/beta hydrolase fold
PF07969	Amidohydrolase family
PF07976	Phenol hydroxylase, C-terminal dimerisation domain
PF07983	X8 domain
PF10348	Domain of unknown function (DUF2427)
PF10355	Protein of unknown function (Ytp1)
PF11578	Protein of unknown function (DUF3237)
PF13243	Prenyltransferase-like
PF13249	Prenyltransferase-like
PF13813	Membrane bound O-acyl transferase family
PF14558	ML-like domain
